# Supplementary material for: An evaluation of the Arabian Sea Mini Warm Pool's advancement during its mature phase using a coupled atmosphere-ocean numerical model
Source: Copernicus journal article supplement (doi:10.5194/egusphere-2024-2848), 2024-09-24
Supplement: Supplementary file 1 [file egusphere-2024-2848-supplement-version2.pdf]

# **An evaluation of the Arabian Sea Mini Warm Pool's advancement during its mature phase using a coupled atmosphere-ocean numerical model**

5 Sankar Prasad Lahiri<sup>1</sup>, Kumar Ravi Prakash<sup>1,2</sup>, Vimlesh Pant<sup>1</sup>

<sup>1</sup>Centre for Atmospheric Sciences, Indian Institute of Technology Delhi, India.

<sup>2</sup>Applied Physics Laboratory, University of Washington Seattle, WA, USA.

*Correspondence to:* Sankar Prasad Lahiri (sankarprasadlahiri2@gmail.com)

10

Contents of the file:

- Text S1
- Figure S1 to S12

## **Introduction:**

15 The following information supports the results: "An evaluation of the Arabian Sea Mini Warm Pool's advancement during its mature phase using a coupled atmosphere-ocean numerical model."

## **Text S1: Interannual Variation of Mini Warm Pool Area:**

20 The interannual Variation of MWP area is shown in Fig. S1. In recent years, 2013 and 2016 have been the years with an area of the MWP less than and more than 0.25 standard deviation, respectively. In 2018, the MWP area was closer to climatology. As a result, these three years have been selected for the simulation in our study.

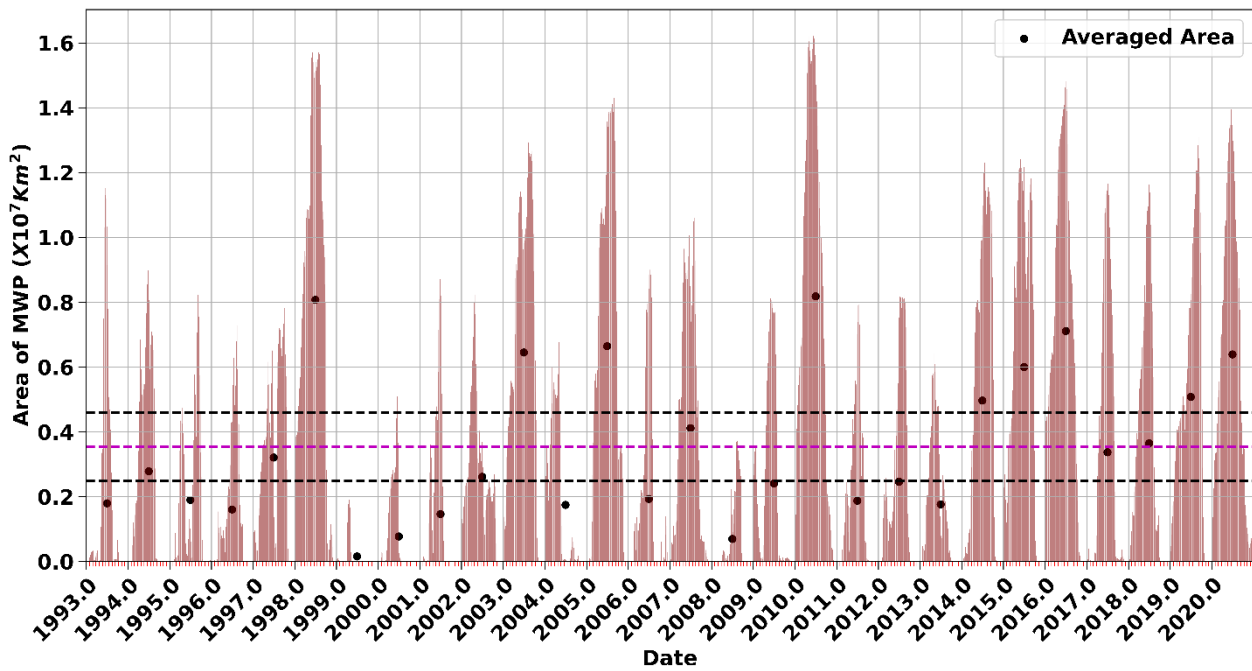

Figure S1: Area MWP area from 1993 to 2020. The black dashed lines suggest the 0.25 standard deviation, while the magenta dashed line shows the mean area. The black dot in each year depicts the average MWP area. The area is calculated following the criteria of Li et al. (2023).

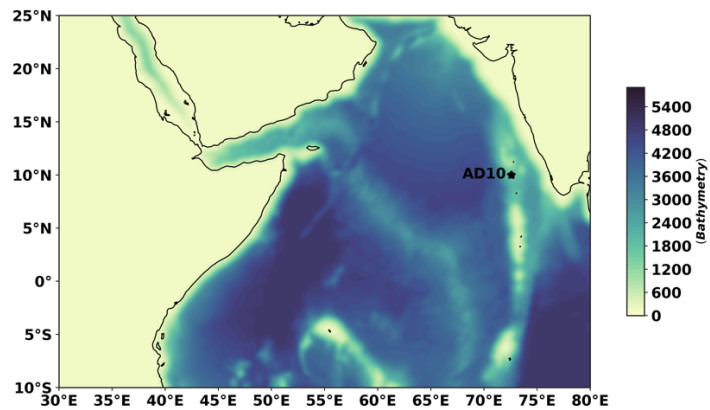

Figure S2: Location of the buoy AD10.

Vertical Temperature and Salinity in numerical model and AD10 buoy data in 2018

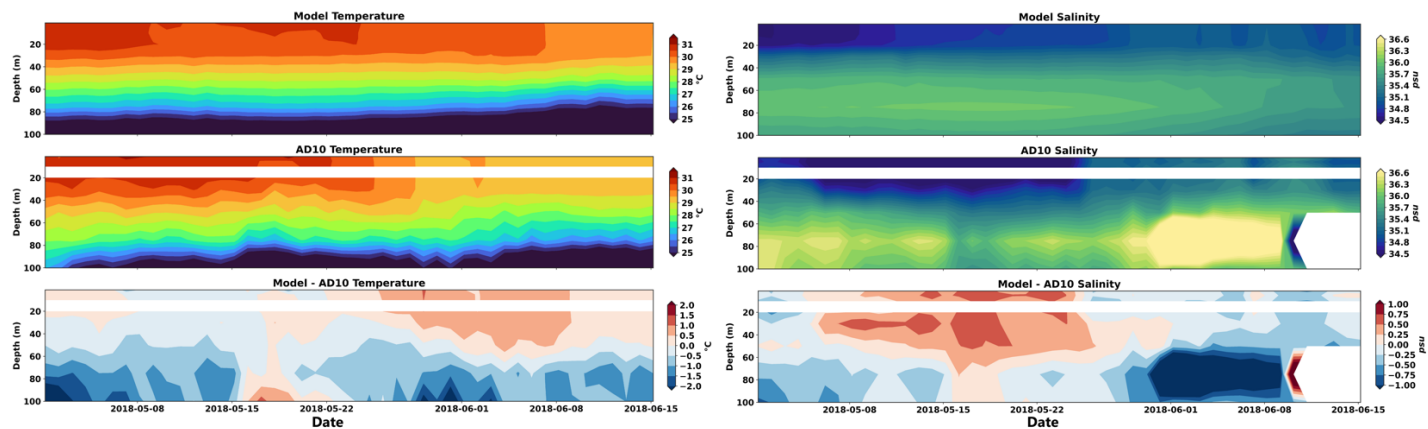

Figure S3: A comparison of the vertical temperature and salinity profiles between AD10 and the nearest point location in the numerical model for 2018.

Vertical Temperature and Salinity in numerical model and AD10 buoy data in 2013

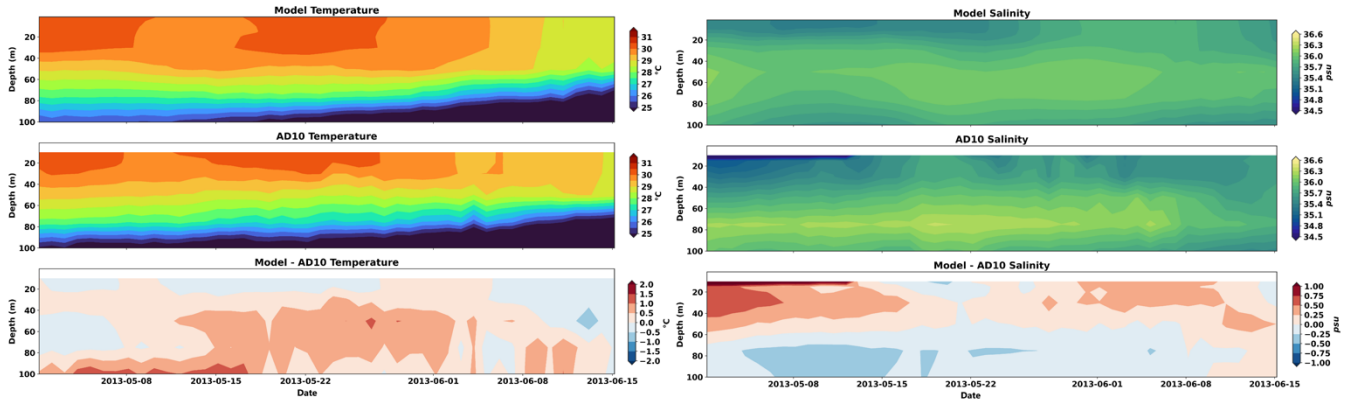

Figure S4: A comparison of the vertical temperature and salinity profiles between AD10 and the nearest point location in the numerical model for 2013.

45

Vertical Temperature and Salinity in numerical model and AD10 buoy data in 2016

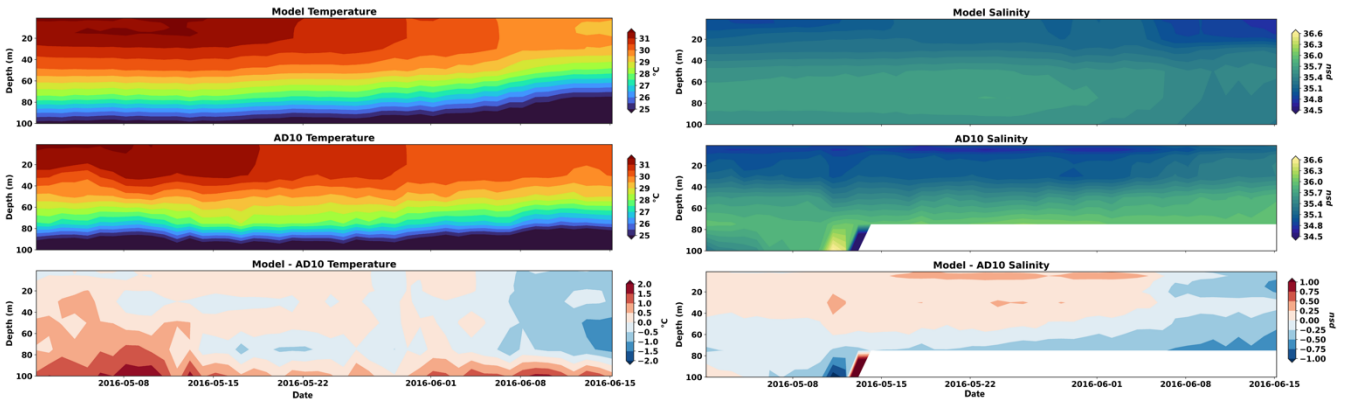

Figure S5: A comparison of the vertical temperature and salinity profiles between AD10 and the nearest point location in the numerical model for 2016.

## Shortwave Radiation Flux

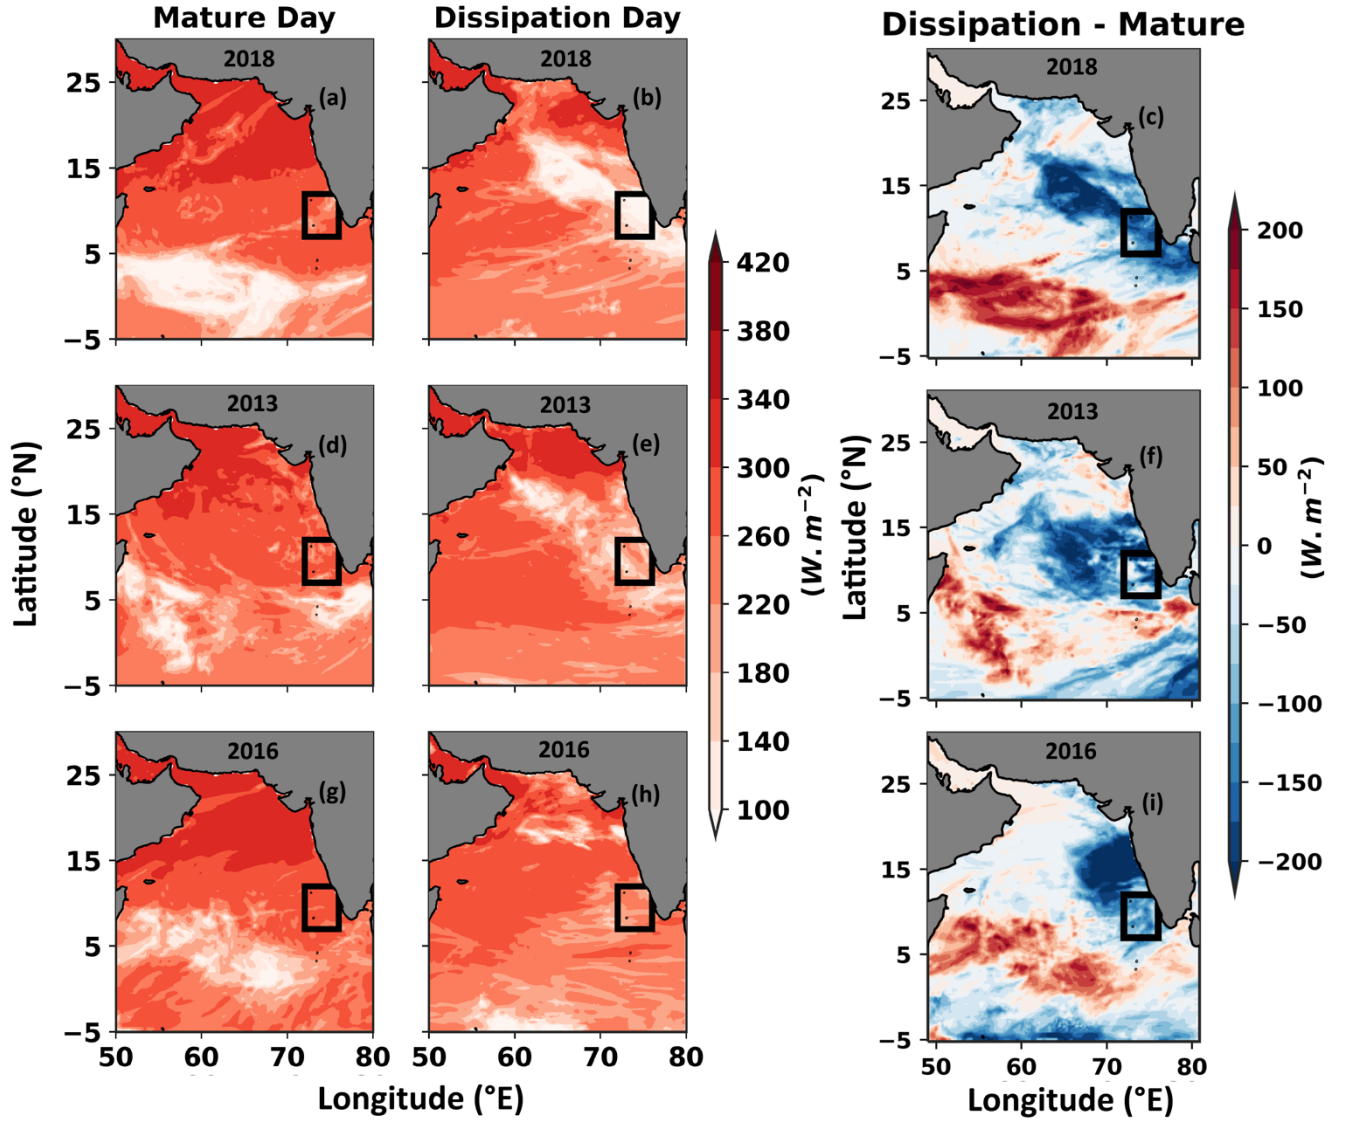

Figure S6: Comparison of shortwave radiation flux in mature and dissipation days in 2018 (a-c) (MWP strength close to climatology), 2013 (d-f) (MWP was missing), and 2016 (g-i) (MWP was intense). (c), (f), and (i) indicate the difference between dissipation and mature day. The mature days for the MWP are May 20 in 2018 and 2013 and May 4 in 2016. The dissipation day for the mini warm pool was taken on June 8, 2018, and June 6, 2016.

## Longwave Radiation Flux

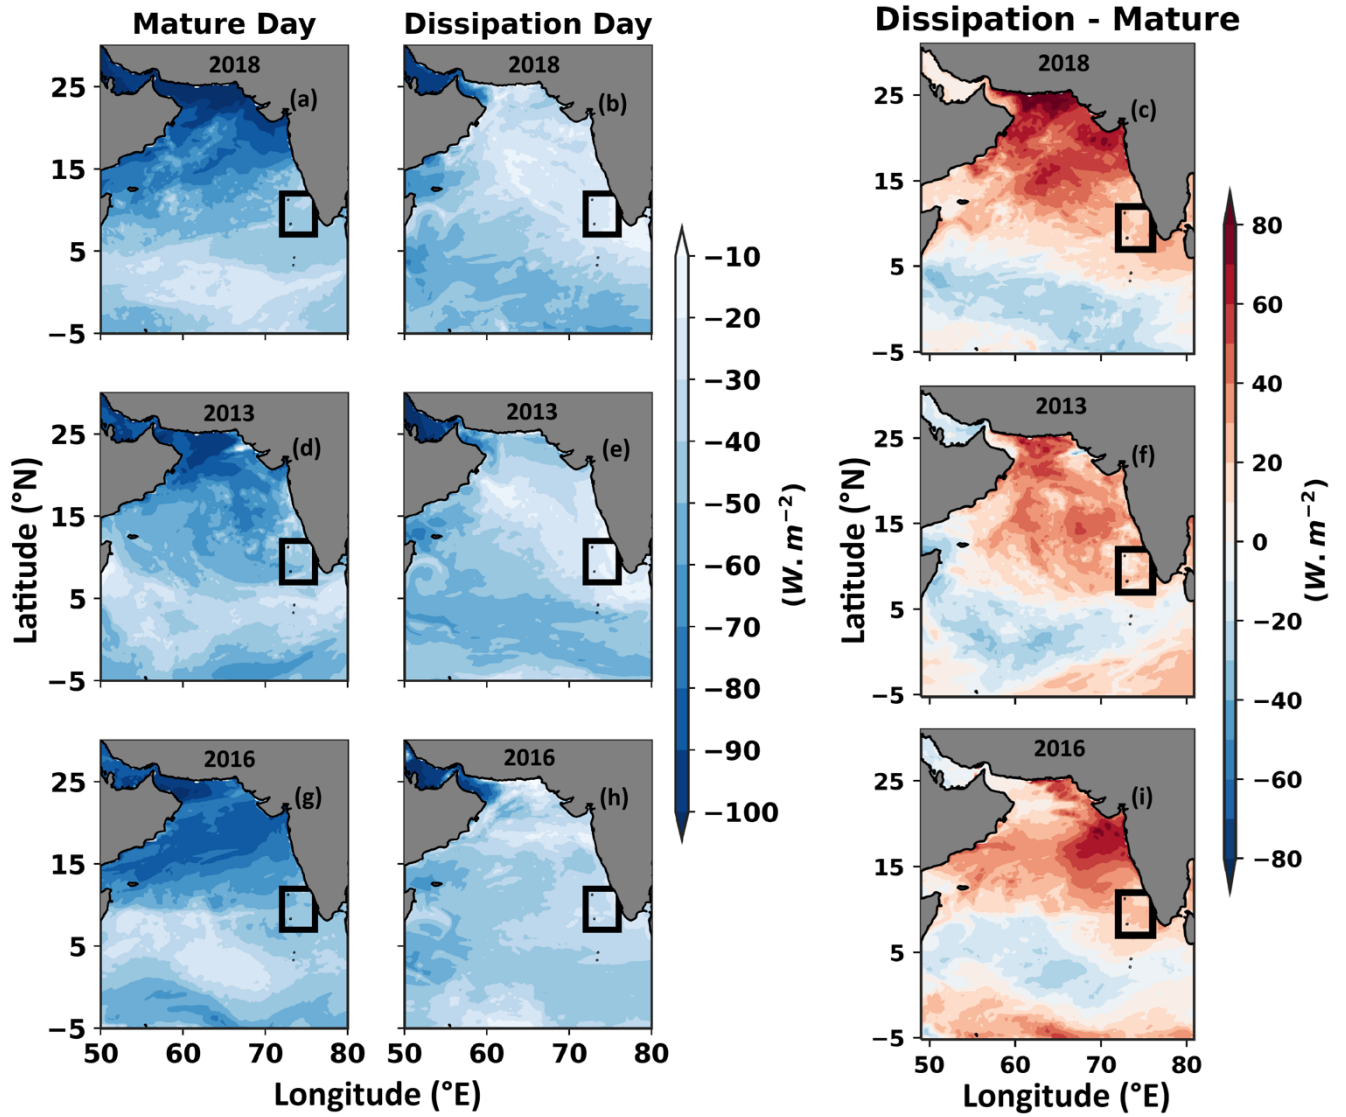

55

Fig. S7 is the same as Fig. S6 but for longwave radiation flux.

## Latent Heat Flux

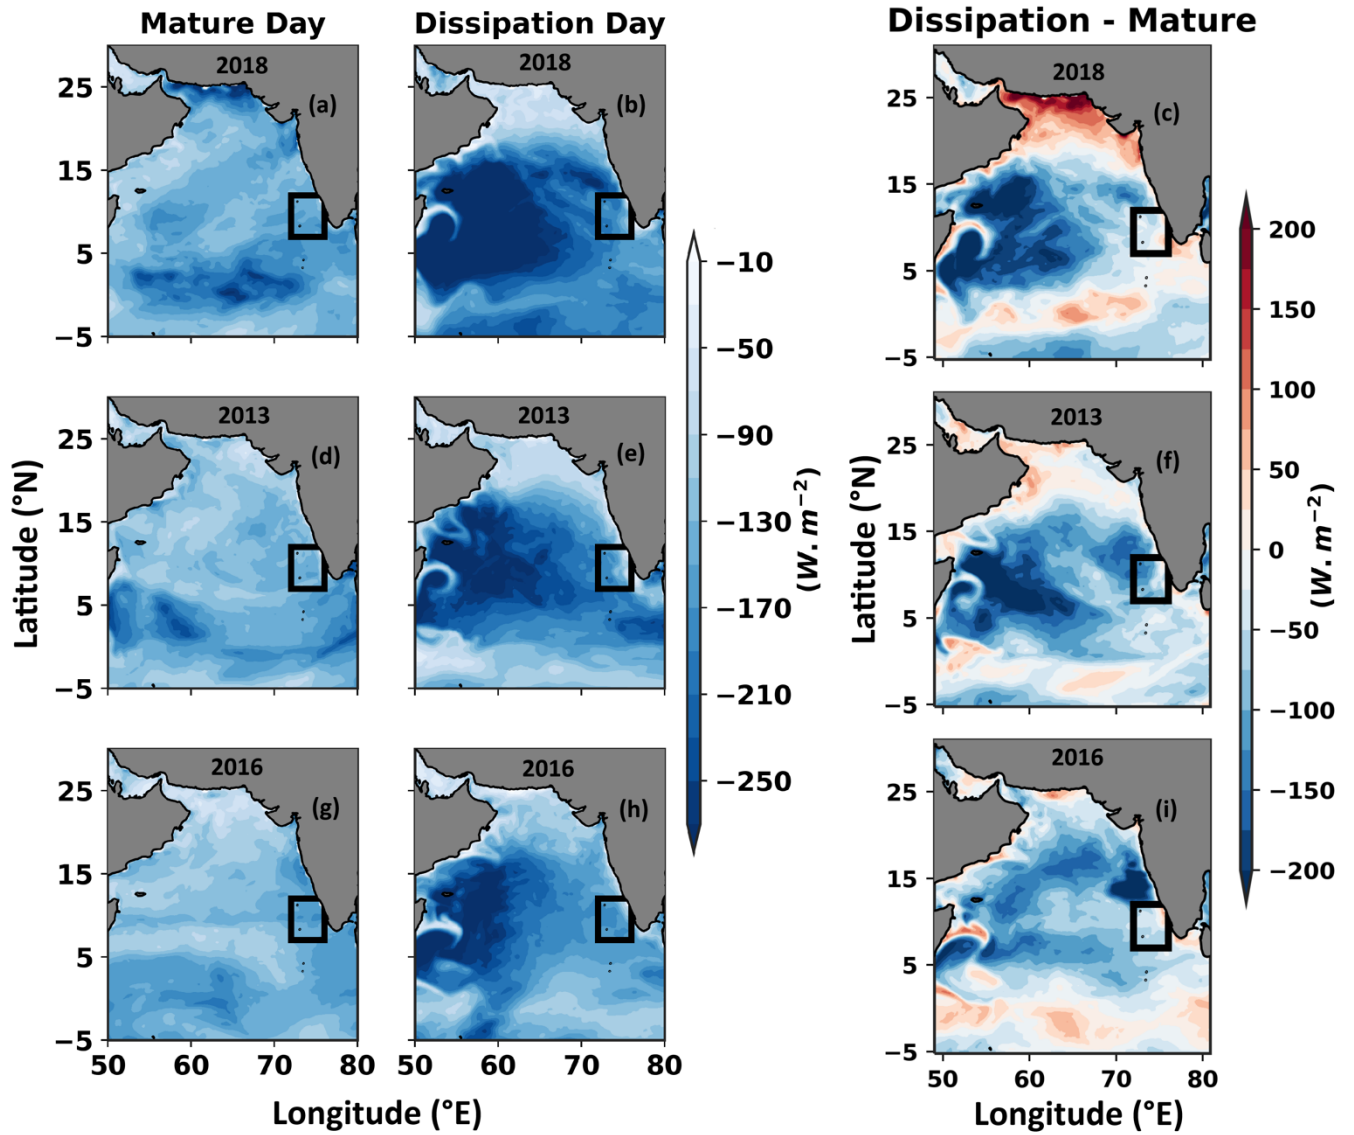

Fig. S8 is the same as Fig. S6 but for latent heat flux.



## Sensible Heat Flux

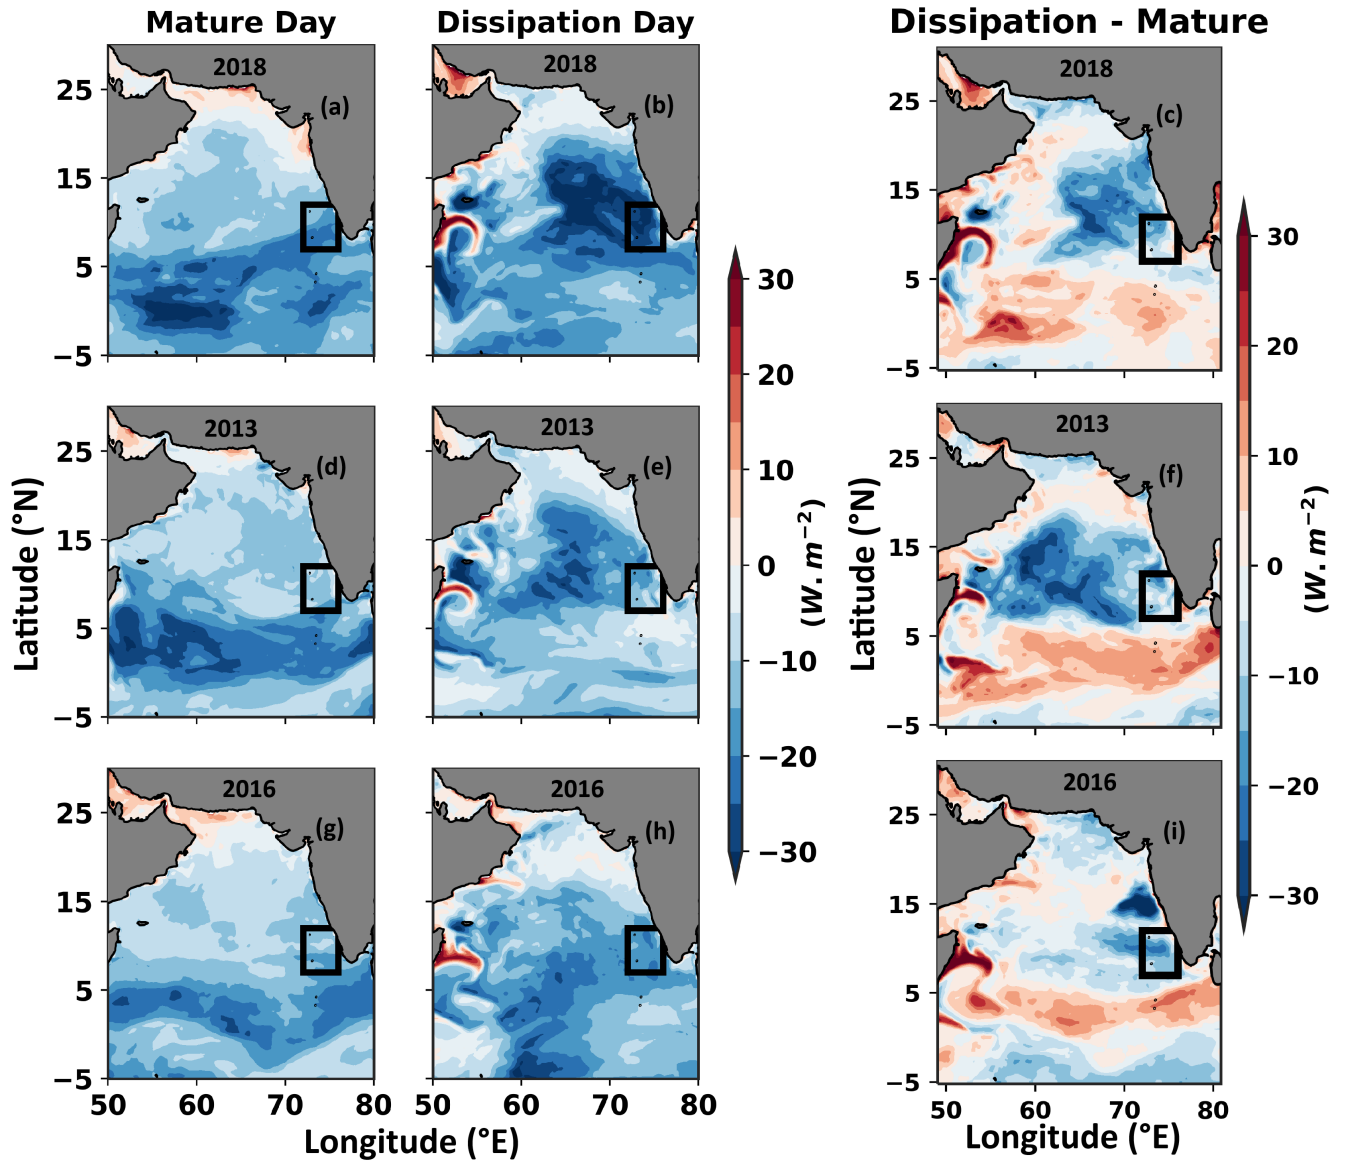

65 Fig. S 9 is the same as Fig. S6 but for sensible heat flux.



## Vertical Temperature

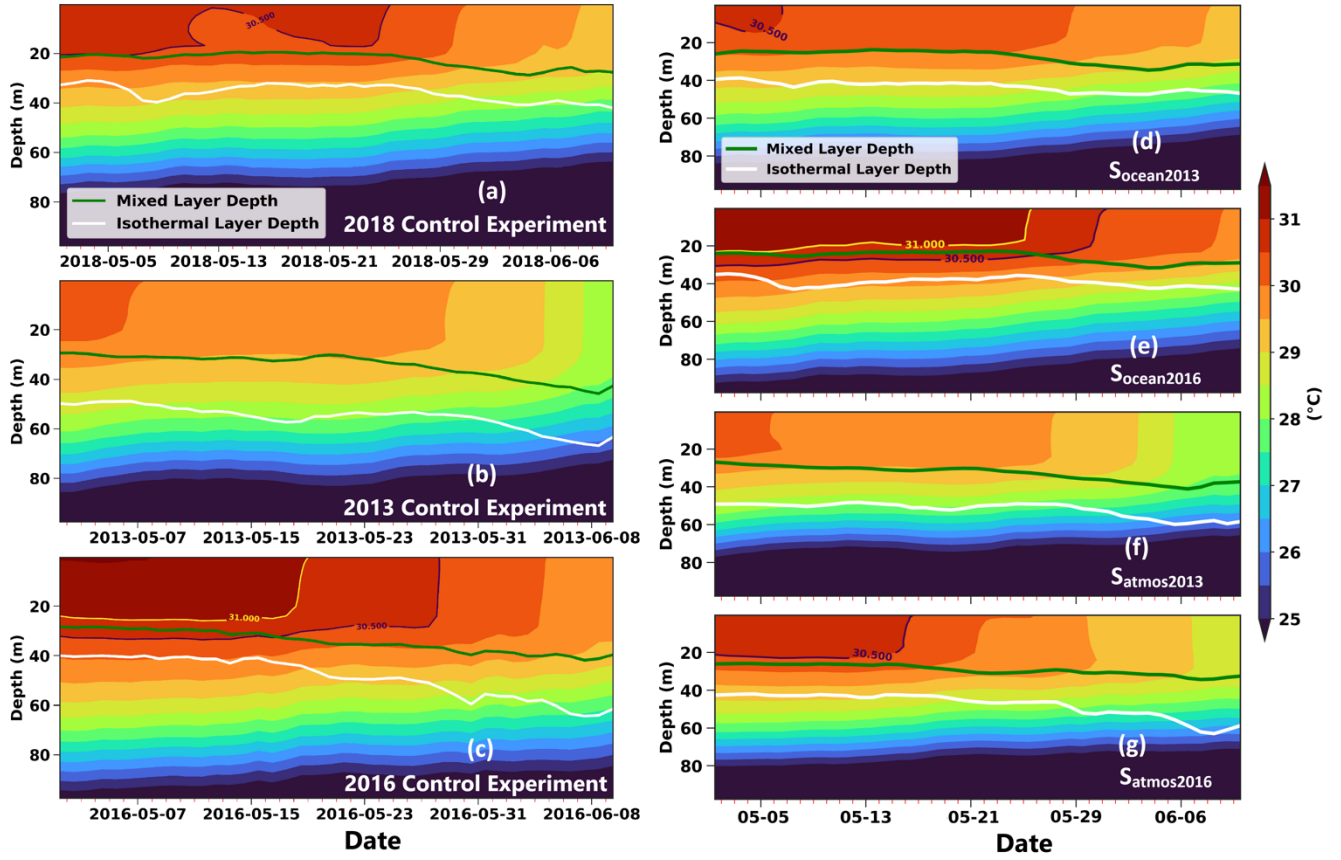

Figure S10: Area averaged (72- 76°E and 7-13°N, i.e., the white box shown in Fig. 1) vertical temperature for three control ((a) 2018 control experiment, (b) 2013 control experiment, and (c) 2016 control experiment) and four sensitivity experiments ((d)  $S_{\text{ocean2013}}$ , (e)  $S_{\text{ocean2016}}$ , (f)  $S_{\text{atmos2013}}$ , and (g)  $S_{\text{atmos2016}}$ ). In the sensitivity experiments, the oceanic and atmospheric conditions have been changed to various years; thus, only the day and month are kept on the x-axis.

# $P_{TKE}$ by Thermal Buoyancy Flux

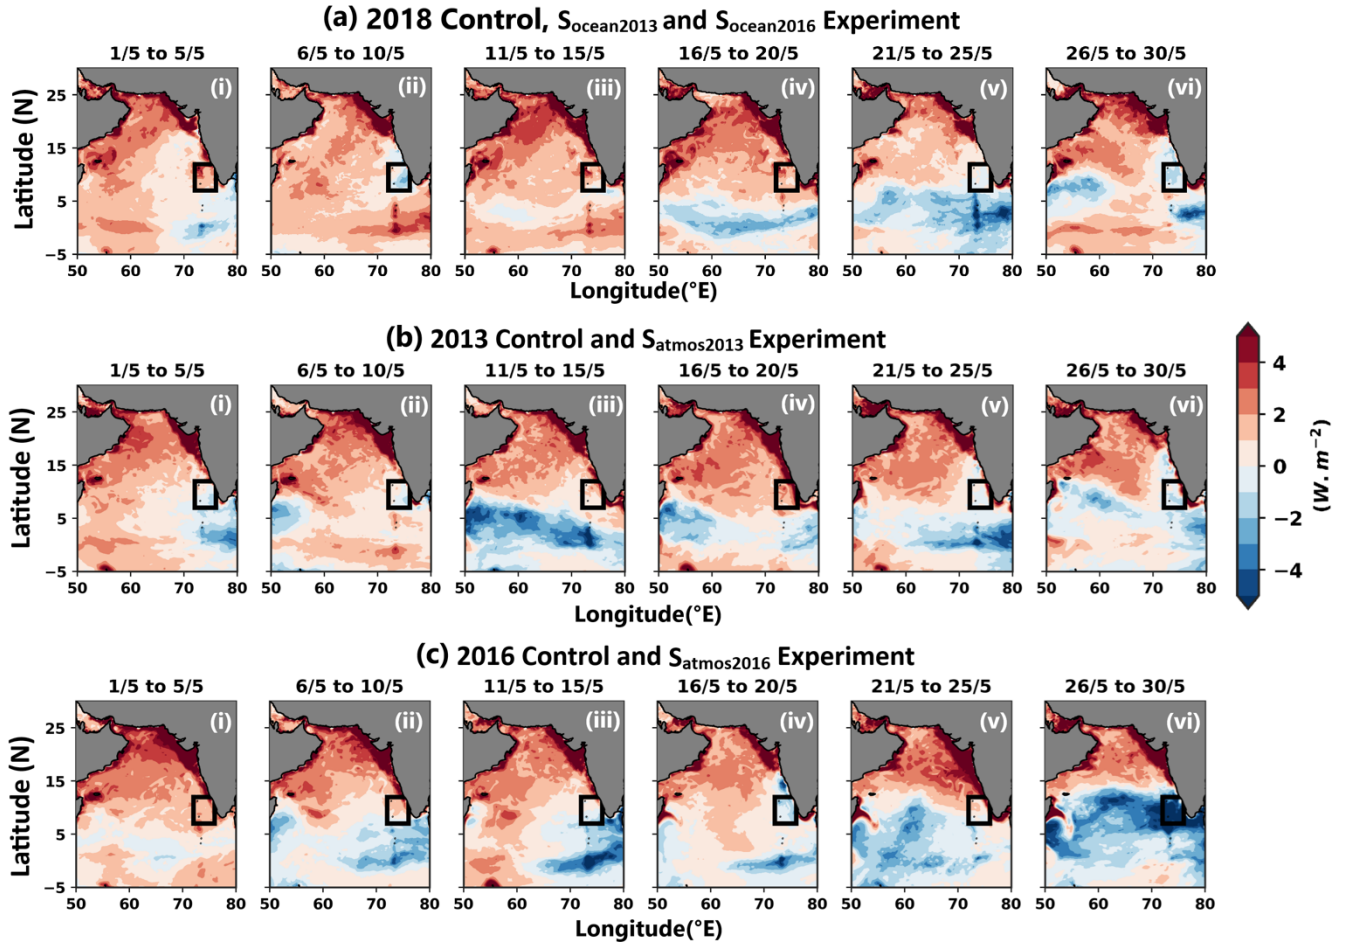

Fig. S11 5-day average evolution of thermal buoyancy flux-induced production of turbulent kinetic energy ( $P_{TKE}$ ) for all control and sensitivity experiments. The fill values are showing after multiplying  $10^4$ . Atmospheric forcings are identical for the 2018 control,  $S_{ocean2013}$ , and  $S_{ocean2016}$  experiments. Likewise, the  $P_{TKE}$  remains the same across all three experiments (a). Similarly, the  $P_{TKE}$  owing to thermal buoyancy flux in the 2013 control experiment and  $S_{ocean2013}$  (b) and the 2016 control experiment and  $S_{ocean2016}$  (c) are identical. Table 1 shows details from the sensitivity experiments. The days associated with mean evolution are listed at the top of each subplot.

# $P_{TKE}$ by Haline Buoyancy Flux

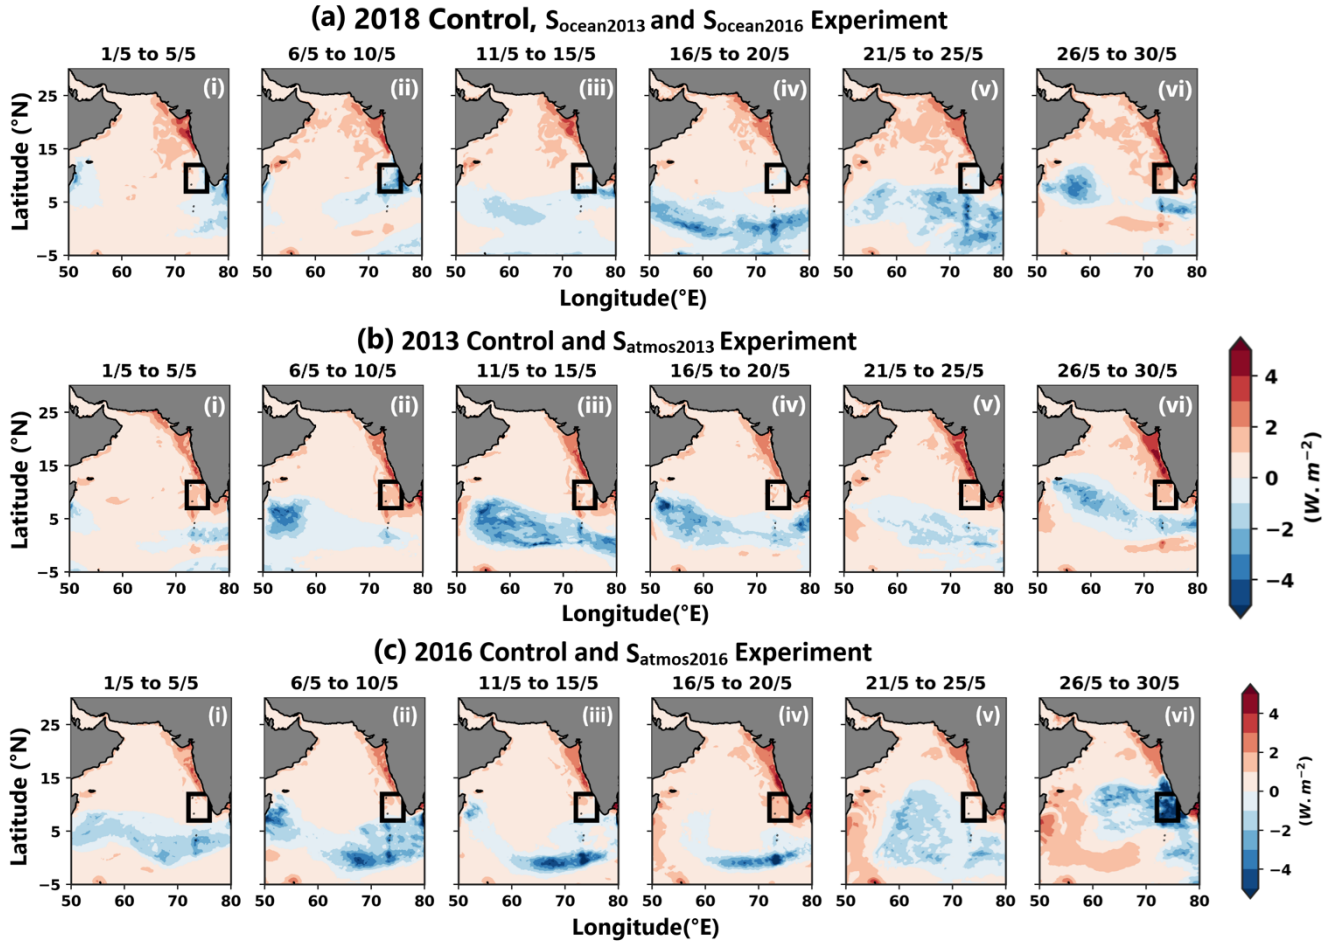

Fig. S12 is the same as Fig. S11 but for  $P_{TKE}$  due to haline buoyancy flux.

## References

Li, N., Zhu, X., Wang, H., Zhang, S., & Wang, X. (2023). Intraseasonal and interannual variability of sea temperature in the Arabian Sea Warm Pool. *Ocean Science*, 19(5), 1437–1451. <https://doi.org/10.5194/os-19-1437-2023>
